# Supplementary material
Source: MDPI journal article supplement (https://www.mdpi.com/2073-4344/12/7/779)
Supplement: s1 [file s1]

## Supplementary Information

# Employing Artificial Neural Network in Correlating a Hydrogen-Selective Catalytic Reduction Performance with Crystallite Sizes of a Biomass-Derived Bimetallic Catalyst

Ibrahim Yakub<sup>1,\*</sup>, Ahmad Beng Hong Kueh<sup>2,3</sup>, Edwin Andres Pineda De La O<sup>4</sup>, Md Rezaur Rahman<sup>1</sup>, Mohamad Hardyman Barawi<sup>5</sup>, and Mohammad Omar Abdullah<sup>1</sup>, Mugahed Amran<sup>6,7,\*</sup>, Roman Fediuk<sup>8,9</sup>, Nikolai Ivanovich Vatin<sup>9</sup>

Table S1. Metal content in all of the synthesized catalysts in this study.

| Sample ID     | Average (wt%) |       | Standard Deviation (wt%) |       | Ratio (Fe/Cu) |
|---------------|---------------|-------|--------------------------|-------|---------------|
|               | Cu            | Fe    | Cu                       | Fe    |               |
| PKAC/Cu       | 8.32          | 0     | 0.020                    | NR    | NR            |
| PKAC/Cu20     | 13.37         | 0     | 0.020                    | NR    | NR            |
| PKAC/Cu30     | 14.47         | 0     | 0.022                    | NR    | NR            |
| PKAC/Fe       | 0             | 9.42  | NR                       | 0.020 | NR            |
| PKAC/FeCu     | 7.08          | 6.25  | 0.005                    | 0.019 | 0.88          |
| PKAC/Fe10Cu20 | 16.09         | 5.29  | 0.036                    | 0.013 | 0.33          |
| PKAC/Fe10Cu30 | 18.26         | 5.09  | 0.060                    | 0.033 | 0.28          |
| PKAC/Fe20Cu10 | 8.92          | 8.30  | 0.070                    | 0.009 | 0.93          |
| PKAC/Fe20Cu20 | 19.56         | 11.09 | 0.173                    | 0.025 | 0.57          |
| PKAC/Fe20Cu30 | 21.91         | 8.74  | 0.023                    | 0.013 | 0.40          |
| PKAC/Fe30Cu10 | 9.78          | 10.49 | 0.166                    | 0.021 | 1.07          |
| PKAC/Fe30Cu20 | 16.84         | 15.93 | 0.034                    | 0.046 | 0.95          |
| PKAC/Fe30Cu30 | 22.57         | 14.86 | 0.019                    | 0.043 | 0.66          |
